# Supplementary material for: The C-Terminal Domain of the Bacillus thuringiensis Cry4Ba Mosquito-Specific Toxin Serves as a Potential Membrane Anchor
Source: MDPI journal article supplement (doi:10.3390/toxins11020062), 2019-01-23
Supplement: s1 [file s1]

## Supplementary Materials: The C-terminal Domain of the *Bacillus thuringiensis* Cry4Ba Mosquito-Specific Toxin Serves as a Potential Membrane Anchor

Anon Thammasittirong, Chompounoot Imtong, Wilaiwan Sriwimol, Somsri Sakdee and Chanan Angsuthanasombat

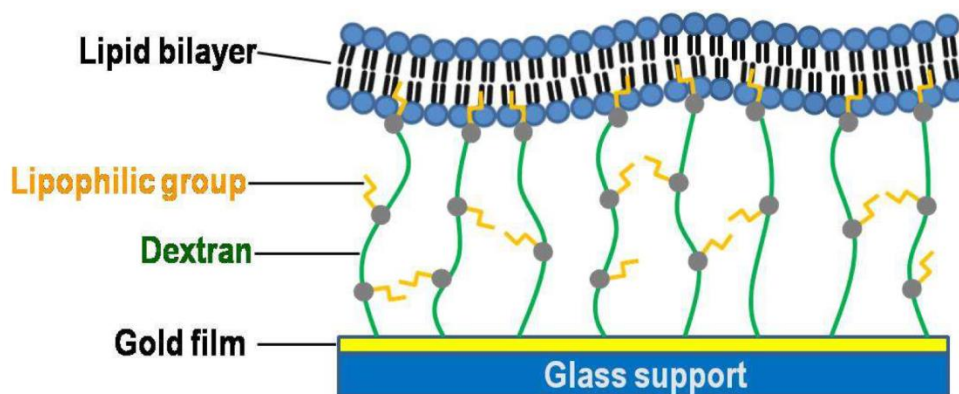

**Figure S1.** Schematic diagram of immobilized bilayer membrane sensor chip surface. After the binding to the sensor chip coated with carboxymethylated (lipophilic group) dextran, the immobilized liposomes would spontaneously fuse to form a large single-bilayer membrane.
